# Supplementary material for: Anodic fabrication of nanostructured CuxS and CuNiSx thin films and their hydrogen evolution activities in acidic electrolytes
Source: Royal Society of Chemistry journal article supplement (doi:10.1039/c9nj00962k), 2019-01-01
Supplement: c9nj00962k1.pdf [file c9nj00962k1.pdf]

Supporting information

**Anodic fabrication of nanostructured  $\text{Cu}_x\text{S}$  and  $\text{CuNiS}_x$  thin films and their hydrogen evolution activities in acidic electrolytes**

Iranna Udachyan<sup>1</sup>, Vishwanath R S<sup>2</sup>, Pradeep Kumara C S<sup>1</sup>, Sakthivel Kandaiah<sup>1\*</sup>

<sup>1</sup>School of Chemical Sciences, REVA University, Bangalore, Karnataka-560064, India.

<sup>2</sup>Institute of Physical Chemistry, Polish Academy of Sciences, Warsaw, Poland

**Figure S1**

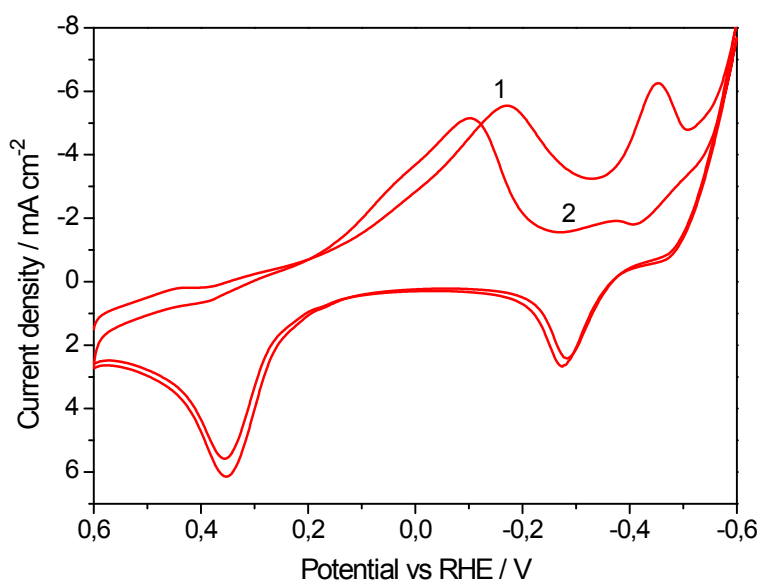

**Figure S1** : Repeated cyclic voltammograms of  $\text{Cu}_x\text{S}$  in  $0.5 \text{ M Na}_2\text{SO}_4$ . 1 – Represent the first cycle, 2 indicates the lower reduction current density for the second cathodic peak.

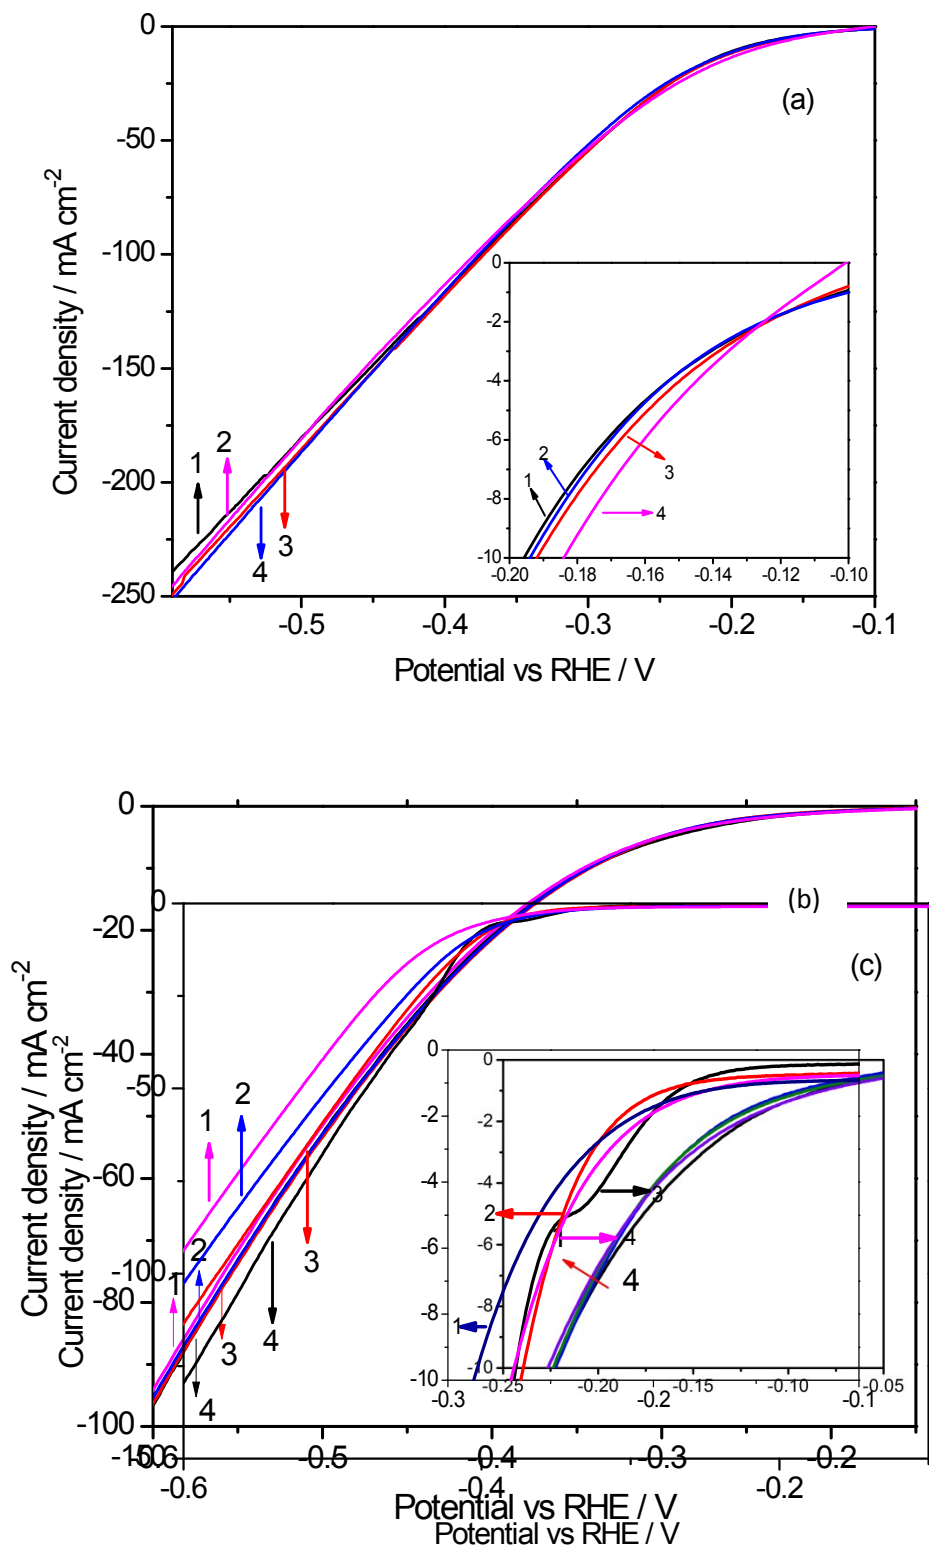

**Figure S3 : LSVs of different electrodes before and after chronoamperometric stability tests a) CuNiS<sub>x</sub>, (b) CuNi, (c) Cu<sub>x</sub>S**

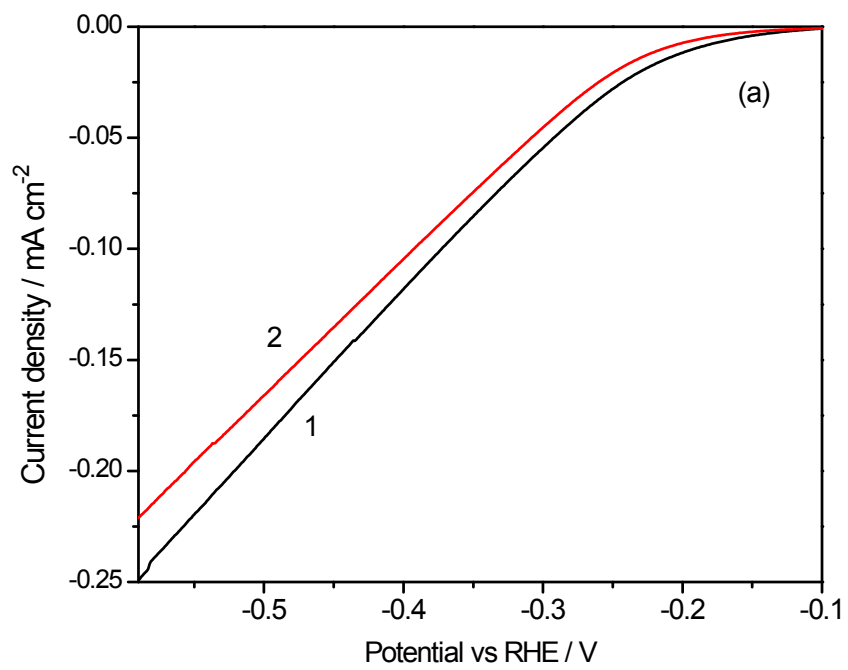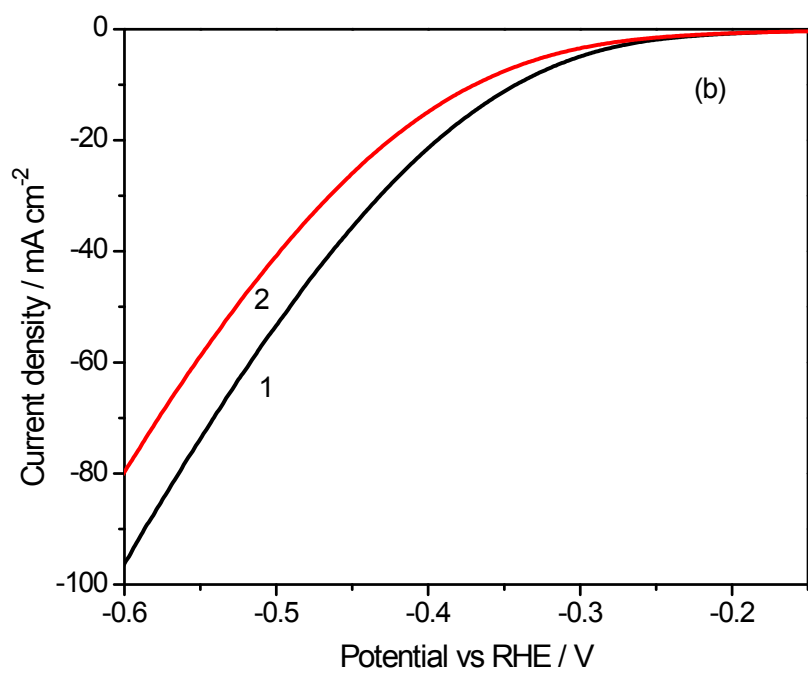

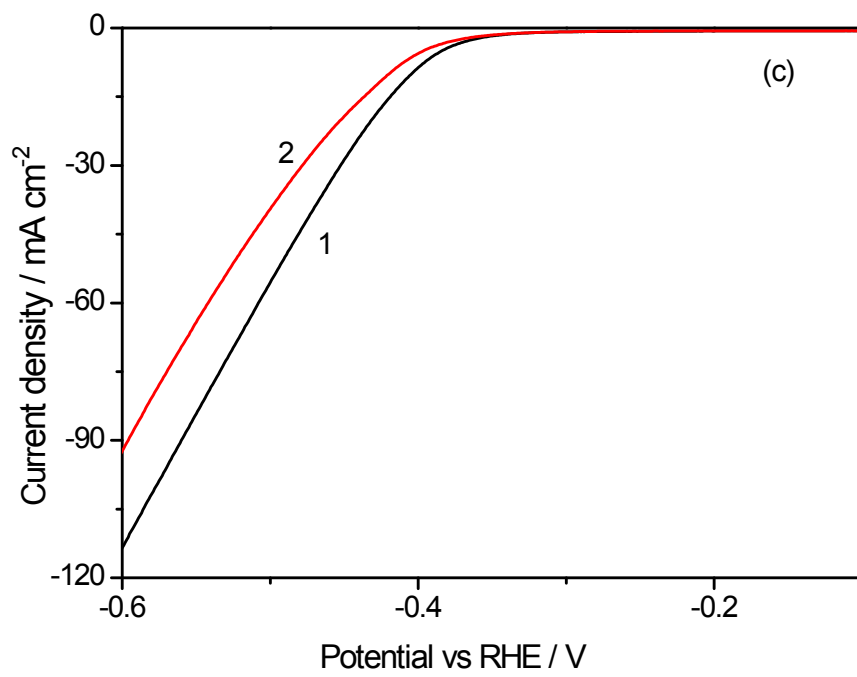

**Figure S4:** Potential dependant Nyquist plots of (a) CuNiS<sub>x</sub>, (b) CuNi, (c) Cu<sub>x</sub>S in 0.5 M H<sub>2</sub>SO<sub>4</sub>.  
1 – at -0.2 V , 2 at -0.3 V and 3 at -0,4 V vs RHE

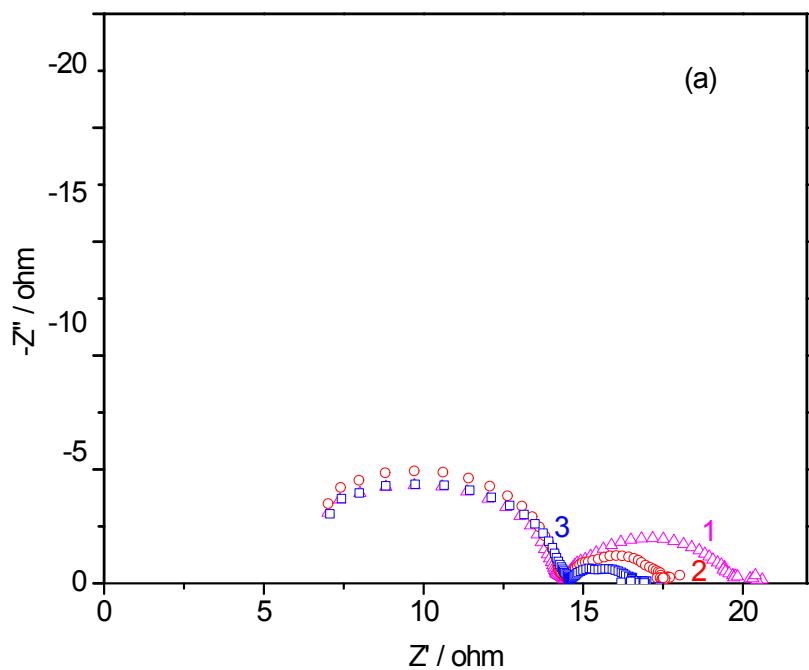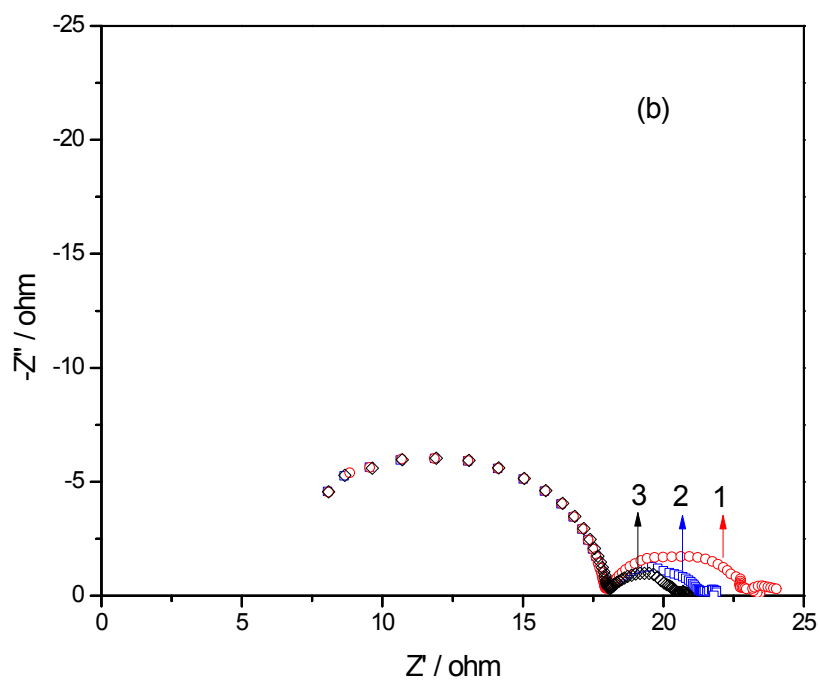

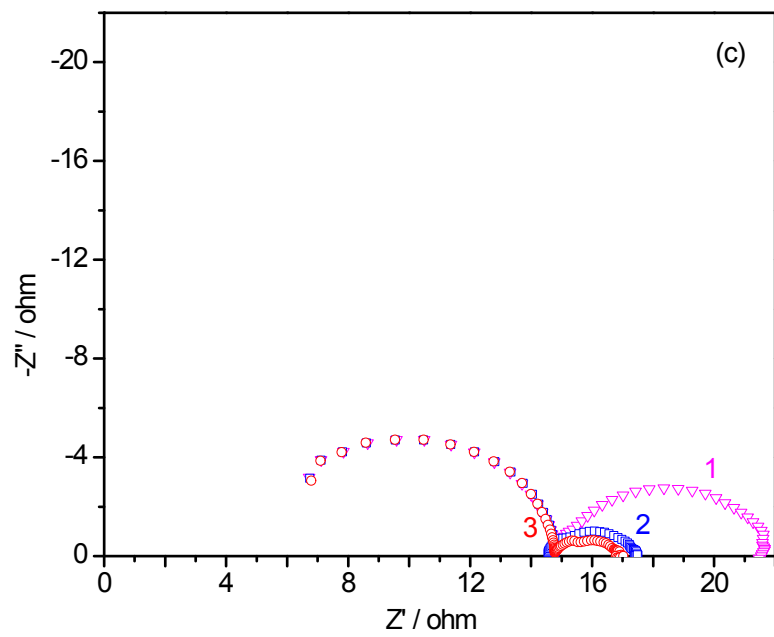

**Figure S5:** Constant potential stability test of (1)  $\text{Cu}_x\text{S}$ , (2)  $\text{CuNi}$ , (3)  $\text{CuNiS}_x$  performed in 0.5M  $\text{H}_2\text{SO}_4$  using carbon rod as counter electrode.

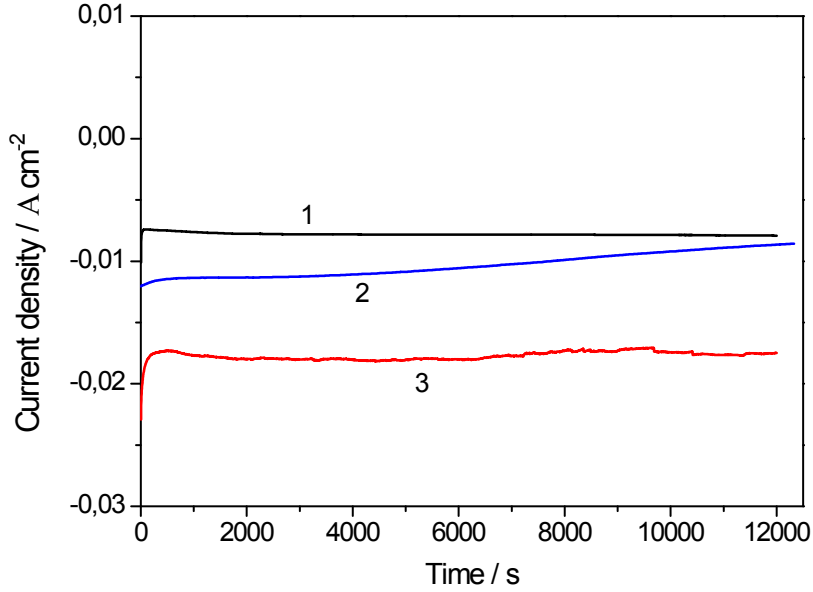

At higher oxygen evolution rates, the surface of carbon rod undergo formation of loose carbon particles and come into the electrolyte solution. However the current density behaviour are similar to the Pt counter.

**Table S1:** Comparison of overpotential requirement and Tafel slope values for different electrocatalyst and the present thin film electrode materials.

| Electrocatalyss              | Cathodic overpotential for 10 mA $\text{cm}^{-2}$ in 0.5 M $\text{H}_2\text{SO}_4$ / mv | Tafel Slope / mV/dec |
|------------------------------|-----------------------------------------------------------------------------------------|----------------------|
| Pt/C                         | 30                                                                                      | 30                   |
| $\text{MoS}_2$               | 230                                                                                     | 101                  |
| $\text{MoS}_2/\text{RGO}$    | 150                                                                                     | 40                   |
| $\text{MoS}_2\text{-CoSe}_2$ | 68                                                                                      | 36                   |
| $\text{CoSe}_2$              | 130                                                                                     | 48                   |
| $\text{NiSe}_2$              | 230                                                                                     | 57                   |
| $\text{NiS}_2$               | 240                                                                                     | 42                   |
| $\text{CoS}_2$               | 230                                                                                     | 44                   |
| $\text{FeS}_2$               | 270                                                                                     | 62                   |
| * $\text{Cu}_x\text{S}$      | 270                                                                                     | 102                  |
| * $\text{CuNiS}_x$           | 213                                                                                     | 98                   |
| * $\text{CuNi}$              | 195                                                                                     | 128                  |
| Cu - bare                    | 465                                                                                     | 158                  |



**‘present work, direct deposition by electrochemical method, without any conductive binders**

## References

1. M. Gao, J. Liang, Y. Zheng, Y. Xu, J. Jiang, Q. Gao, J. Li and S. Yu, “An efficient molybdenum disulfide/cobalt diselenide hybrid catalyst for electrochemical hydrogen generation,” *Nat commun*, 6, 5982 (2015).
2. D. Kong, J.J. Cha, H. Wang, H. Ryoung Lee, and Yi Cui, First-Row Transition Metal Dichalcogenide Catalysts for Hydrogen Evolution Reaction, *Energy Environ. Sci.*, 2013,6, 3553-3558m (2013)
3. J. Nan, B. Lia, P. Marina, G. Sheraz, Y. Junko and, S. Yujie, “Electrodeposited nickel-sulfide films as competent hydrogen evolution catalysts in neutral water,” *J. Mater Chem. A*, 2, 19407-19414 (2014).
4. T. F. Jaramillo, K. P. Jørgensen, J. Bonde, J. H. Nielsen, S. Horch and I. Chorkendorff, “Identification of active edge sites for electrochemical H<sub>2</sub> evolution from MoS<sub>2</sub> nanocatalysts,” *Science*, 317, 100-102 (2007).
5. B. Hinnemann, P. G. Moses, J. Bonde, K. P. Jørgensen, J. H. Nielsen, S. Horch , I. Chorkendorff and J. K. Nørskov, “Biomimetic Hydrogen Evolution: MoS<sub>2</sub> Nanoparticles as Catalyst for Hydrogen Evolution,” *J. Am. Chem. Soc*, 127, 5308-5309 (2005).
